# Supplementary material for: Individual participant data (IPD) meta-analysis of psychological relapse prevention interventions versus control for patients in remission from depression: a protocol
Source: PubMed Central journal article supplement (PMC7044815; doi:10.1136/bmjopen-2019-034158), 2020-02-13
Supplement: bmjopen-2019-034158supp001.pdf [file bmjopen-2019-034158supp001.pdf]

**PubMed:**

```
(((((("depressive disorder"[MeSH Terms] OR "depression"[MeSH Terms] OR depress*[Title/Abstract]
OR affective disorder[Title/Abstract] OR affective disorders[Title/Abstract] OR
dysphoria[Title/Abstract] OR dysthymia[Title/Abstract] OR depressed mood[Title/Abstract] OR
mood disorder[Title/Abstract]))) AND (("recurrence"[MeSH Terms] OR ("recur*[Title/Abstract] OR
("chroni*[Title/Abstract] OR (relaps*[Title/Abstract] OR ("remi*[Title/Abstract] OR ("treatment
resistant"[Title/Abstract]))) OR ("recurrent depression"[MeSH Terms] OR ("treatment resistant
depression"[Title/Abstract]))) AND ("secondary prevention"[MeSH Terms] OR "prevention"[MeSH]
OR "preventive [MeSH Terms]" OR "maintenance"[Title/Abstract] OR
("continuation"[Title/Abstract] OR ("prophyla*[Title/Abstract] AND ("randomized controlled
trial"[Publication Type] OR controlled clinical trial[Title/Abstract] OR random*[Title/Abstract] OR
prevention and control[Title/Abstract]))
```
